# Supplementary material for: Reversible Fe(ii) uptake/release by magnetite nanoparticles
Source: Royal Society of Chemistry journal article supplement (doi:10.1039/c8en00328a), 2018-01-01
Supplement: c8en00328a1.pdf [file c8en00328a1.pdf]

1 Electronic Supplementary Information

2

3 **Reversible Fe(II) Uptake/Release by Magnetite Nanoparticles**

4

5 Huan Peng<sup>1,2</sup>, Carolyn I. Pearce<sup>3</sup>, Alpha T. N'Diaye<sup>5</sup>, Zhenli Zhu<sup>2,\*</sup>, Weifeng Huang<sup>4</sup>,

6 Kevin M. Rosso<sup>3</sup>, Juan Liu<sup>1,6,\*</sup>

7

8 <sup>1</sup>The Key Laboratory of Water and Sediment Sciences, Ministry of Education, College of  
9 Environmental Sciences and Engineering, Peking University, Beijing 100871, P. R. China

10 <sup>2</sup>State Key Laboratory of Biogeology and Environmental Geology, School of Earth  
11 Sciences, China University of Geosciences, Wuhan, Hubei 430074, China

12 <sup>3</sup>Pacific Northwest National Laboratory, Richland, WA 99352, USA

13 <sup>4</sup>College of Engineering, Peking University, Beijing 100871, China

14 <sup>5</sup>Advanced Light Source, Lawrence Berkeley National Laboratory, Berkeley, CA 94720, USA

<sup>6</sup>Beijing Key Laboratory

of Mineral Environmental

Function, Peking

University, Beijing

100871, China

**13 Pages**

---

**1 Section**

**3 Tables**

## 6 Figures

### 15 Section S1. Chemicals, the glovebox, and nanoparticle characterization

16 Disodium anthraquinone-2,6-disulfonate (>98%, oxidized form) was purchased from Tokyo  
17 Chemical Industry, Japan. Other chemical reagents were ACS reagent grade and acquired from Sigma-  
18 Aldrich. Iron(III) chloride hexahydrate (97%), iron(II) chloride tetrahydrate (98%) and ammonium  
19 hydroxide solution (28% NH<sub>3</sub> in H<sub>2</sub>O, 99.99%) used for magnetite synthesis. MES (2-(N-  
20 Morpholino)ethanesulfonic acid, 99%) and HEPES(4-(2-hydroxyethyl)-1-piperazineethane-sulfonic  
21 acid, 99.5%) used as buffer solutions. Iron(II) sulfate heptahydrate (>99%) used for Fe(II)<sub>aq</sub> stock  
22 solution preparation. Capillaries (Charles Supper Company, 0.5mm O.D.) and capillary wax were used  
23 for micro-XRD samples preparation. Deionized water (Millipore Milli-Q system, > 18.2 MΩ cm  
24 resistivity) was boiled for at least 30 min and then degassed for 12 h in glovebox (N<sub>2</sub> atmosphere,  
25 residual O<sub>2</sub> lower than 1 ppm). Degassed and deionized water (DDW) was stored in the glovebox for  
26 preparation of all solutions and suspensions. NP synthesis and all batch experiments were conducted  
27 under ambient conditions inside an anoxic glovebox (N<sub>2</sub> atmosphere from liquid N<sub>2</sub> boil-off with lower  
28 than 1 ppm residual O<sub>2</sub>; Innovative Technology, Inc., Massachusetts) with PureLab GP 2-HE inert gas  
29 purifier. NP suspensions and all stock solutions were prepared and stocked inside the anaerobic  
30 glovebox. All syringe filters, glassware, and plastic were degassed in the glovebox antechamber and  
31 equilibrated with the anaerobic atmosphere prior to use.

32 The concentrations of Fe(II) and total Fe in the suspension of synthetic NPs were measured by acid  
33 digestion. The protocol has been reported in detail in our previous studies.<sup>1, 2</sup> A certain volume of NP  
34 suspension was completely dissolved in N<sub>2</sub>-sparged 5 M HCl solution inside the glovebox overnight  
35 with shaking. Then, the concentrations of dissolved Fe(II) and total Fe in the diluted acid digest  
36 solution were determined using the ferrozine assay<sup>3</sup> with a UV-2501PC spectrophotometer and  
37 inductively coupled plasma optical emission spectrometry (Perkin-Elmer, Optima 2100DV),  
38 respectively. The total Fe(II)/Fe(III) ratios for the synthetic NPs was determined according to the

39 measured concentrations of dissolved Fe(II) and total Fe. All measurements were performed in  
40 triplicate.

41 The specific surface area (SSA) of magnetite NPs was measured via the multipoint Brunauer-  
42 Emmer-Teller (BET) method by using a quantachrome Autosorb automated gas sorption system  
43 (Quantachrome Co.) with the degassing temperature of ~423 K. Particle size and morphology of the  
44 synthetic NPs were measured by JEOL-JEM 2010 transmission electron microscope (TEM). TEM  
45 samples were prepared by placing a drop of diluted suspension on a 400 mesh copper grid coated with  
46 ultrathin carbon layer and then drying it inside the glovebox. The crystalline phase of the synthetic NPs  
47 was determined by powder X-ray diffraction (XRD) using a Philips PW 3040/00 X'pert MPD system  
48 with Cu K $\alpha$  radiation ( $\lambda = 1.5406 \text{ \AA}$ ). The sample for powder XRD measurement was prepared by  
49 magnetically separating NPs from the stock NP suspension and then drying the NPs in the anaerobic  
50 glovebox.

51

52 Table S1. Calculated speciation distribution of 250 - 1000  $\mu\text{M Fe}^{2+}_{(\text{aq})}$  in the 30mM buffer solution at  
 53 pH 6 – 8.

| Initial [ $\text{Fe}^{2+}_{(\text{aq})}$ ]<br>( $\mu\text{M}$ ) | pH 6                 |                     | pH 7                 |                     | pH 8                 |                     |
|-----------------------------------------------------------------|----------------------|---------------------|----------------------|---------------------|----------------------|---------------------|
|                                                                 | $\text{Fe}^{2+}$ (%) | $\text{FeOH}^+$ (%) | $\text{Fe}^{2+}$ (%) | $\text{FeOH}^+$ (%) | $\text{Fe}^{2+}$ (%) | $\text{FeOH}^+$ (%) |
| 250                                                             | 99.972               | 0.028               | 99.725               | 0.275               | 97.316               | 2.682               |
| 500                                                             | 99.973               | 0.027               | 99.727               | 0.273               | 97.329               | 2.669               |
| 750                                                             | 99.973               | 0.027               | 99.728               | 0.272               | 97.341               | 2.657               |
| 1000                                                            | 99.973               | 0.027               | 99.729               | 0.271               | 97.354               | 2.644               |

54

55 Table S2. The slopes, intercepts, and R<sup>2</sup> values of the fitted lines in Figure 2<sup>†</sup>.

| Initial [Fe <sup>2+</sup> <sub>(aq)</sub> ]<br>( $\mu\text{M}$ ) | pH = 6                                         | pH = 7                                          | pH = 8                                           |
|------------------------------------------------------------------|------------------------------------------------|-------------------------------------------------|--------------------------------------------------|
| 0                                                                | y = 0.1819 x + 46.72<br>R <sup>2</sup> = 0.988 | y = 0.06883 x + 40.13<br>R <sup>2</sup> = 0.946 | y = -0.00003x + 0.2469<br>R <sup>2</sup> = 0.999 |
| 250                                                              | y = 0.1639 x + 29.23<br>R <sup>2</sup> = 0.999 | y = 0.04677 x - 16.43<br>R <sup>2</sup> = 0.974 | y = -0.04038 x - 132.3<br>R <sup>2</sup> = 0.930 |
| 750                                                              | y = 0.1455 x + 15.50<br>R <sup>2</sup> = 0.976 | y = 0.04462 x - 37.14<br>R <sup>2</sup> = 0.979 | y = -0.08720 x - 214.7<br>R <sup>2</sup> = 0.992 |
| 1000                                                             | y = 0.1629 x - 56.96<br>R <sup>2</sup> = 0.990 | y = 0.07088 x - 187.8<br>R <sup>2</sup> = 0.993 | NA*                                              |

56 <sup>†</sup> The “Instrument” weighting method was used in the linear fitting for all samples, except the case at  
 57 pH 6 without added Fe<sup>2+</sup><sub>(aq)</sub>. “No weighting” method was used in this specific case, in order to obtain a  
 58 better fitting.

59 \*When magnetite loading was more than  $\sim 0.3 \text{ g L}^{-1}$  ([Fe(II)] equivalent = 1300  $\mu\text{M}$ ),  $\Delta[\text{Fe}^{2+}_{(\text{aq})}]$   
 60 reached a plateau. The data cannot be fitted using a linear function.

61

62

63 Table S3. The slopes, intercepts, and R<sup>2</sup> values of the fitted lines in Figure S4.

| Magnetite Concentration (μM) | pH = 6                                          | pH = 7                                          | pH = 8                                           |
|------------------------------|-------------------------------------------------|-------------------------------------------------|--------------------------------------------------|
| 300                          | y = -0.0797 x + 80.5<br>R <sup>2</sup> = 0.889  | y = -0.1042 x + 34.63<br>R <sup>2</sup> = 0.914 | y = -0.5039 x + 0.144<br>R <sup>2</sup> = 0.965  |
| 800                          | y = -0.1288 x + 196.2<br>R <sup>2</sup> = 0.955 | y = -0.1021 x + 76.27<br>R <sup>2</sup> = 0.826 | y = -0.4899 x + 0.484<br>R <sup>2</sup> = 0.992  |
| 1300                         | y = -0.1291 x + 299.5<br>R <sup>2</sup> = 0.913 | y = -0.2012 x + 138.4<br>R <sup>2</sup> = 0.929 | y = -0.5973 x - 0.0077<br>R <sup>2</sup> = 0.931 |
| 2000                         | y = -0.1268 x + 425.8<br>R <sup>2</sup> = 0.952 | y = -0.1694 x + 160.1<br>R <sup>2</sup> = 0.856 | y = -0.5559 x + 0.084<br>R <sup>2</sup> = 0.945  |
| 3000                         | y = -0.2019 x + 575.2<br>R <sup>2</sup> = 0.974 | y = -0.2123 x + 250.5<br>R <sup>2</sup> = 0.964 | y = -0.6358 x + 0.155<br>R <sup>2</sup> = 0.999  |

64

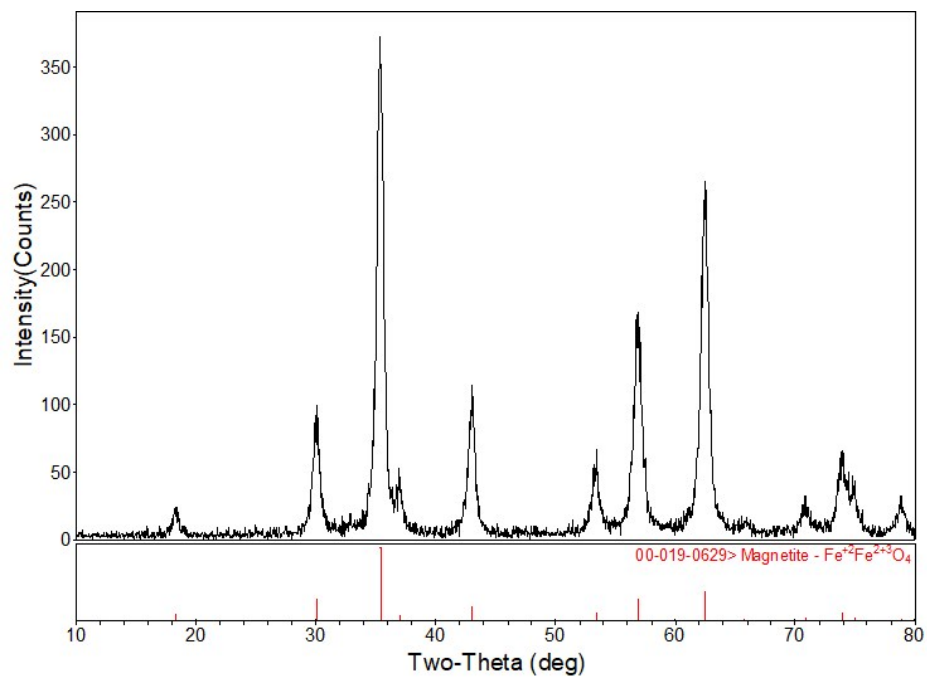

65

66 Figure S1. XRD pattern of synthetic magnetite NPs. The reference for magnetite (JCPDS card number:  
67 00-019-0629) is shown in red at the bottom.

68

69

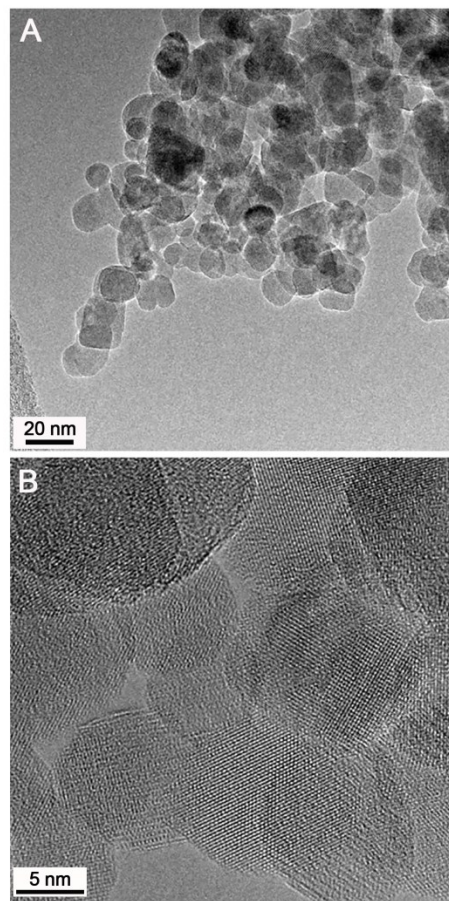

70

71 Figure S2. The low (A) and high (B) magnification TEM images of synthetic magnetite NPs.

72



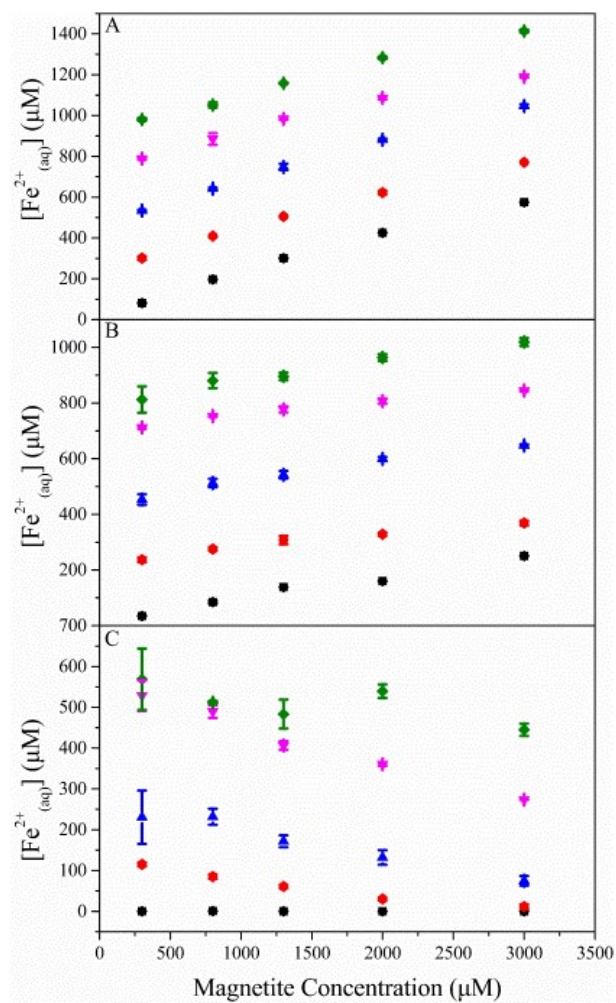

74

75 Figure S3. The equilibrium concentrations of  $Fe^{2+}_{(aq)}$  after 24-hour reactions in the suspensions of 300 -  
 76 3000  $\mu M$  magnetite NPs amended with 0  $\mu M$  (black), 250  $\mu M$  (red), 500  $\mu M$  (blue), 750  $\mu M$  (magenta),  
 77 and 1000  $\mu M$  (green)  $Fe^{2+}_{(aq)}$  at pH 6 (A), 7 (B), and 8 (C), respectively.

78

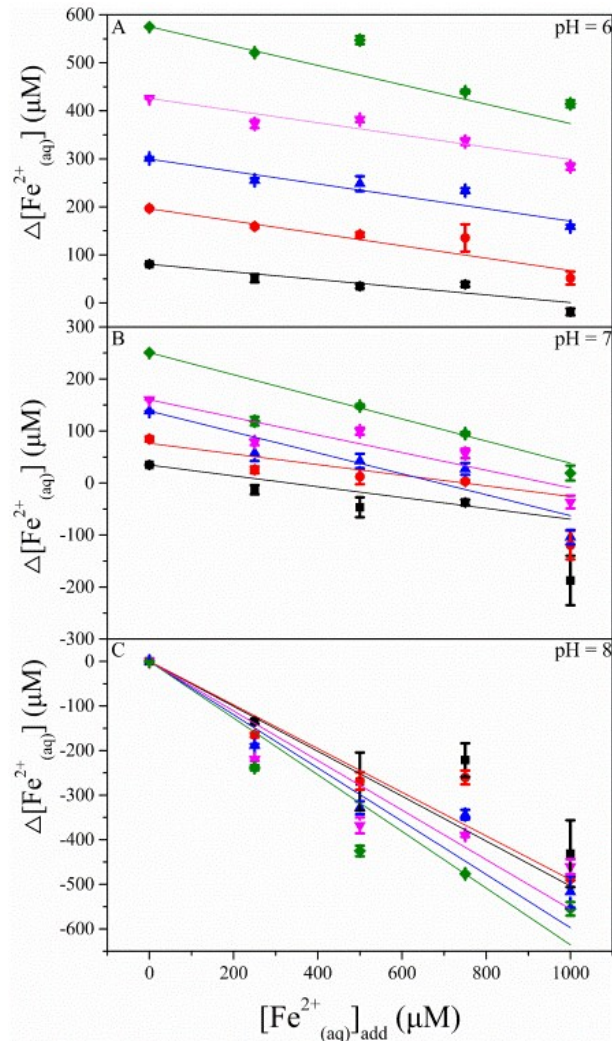

79

80 Figure S4.  $\Delta[\text{Fe}^{2+}_{(\text{aq})}]$  versus the concentration of added  $\text{Fe}^{2+}_{(\text{aq})}$  at pH 6 (A), pH 7 (B), and pH 8 (C),  
 81 respectively, in the suspensions of magnetite NPs with  $[\text{Fe}(\text{II})]$  equivalent of 300  $\mu\text{M}$  (black), 800  $\mu\text{M}$   
 82 (red), 1300  $\mu\text{M}$  (blue), 2000  $\mu\text{M}$  (magenta) and 3000  $\mu\text{M}$  (green), respectively. The dots are the  
 83 measured results and the corresponding lines are the fitted lines. The equations and  $R^2$  values of the  
 84 fitted lines are shown in Table S3.

85

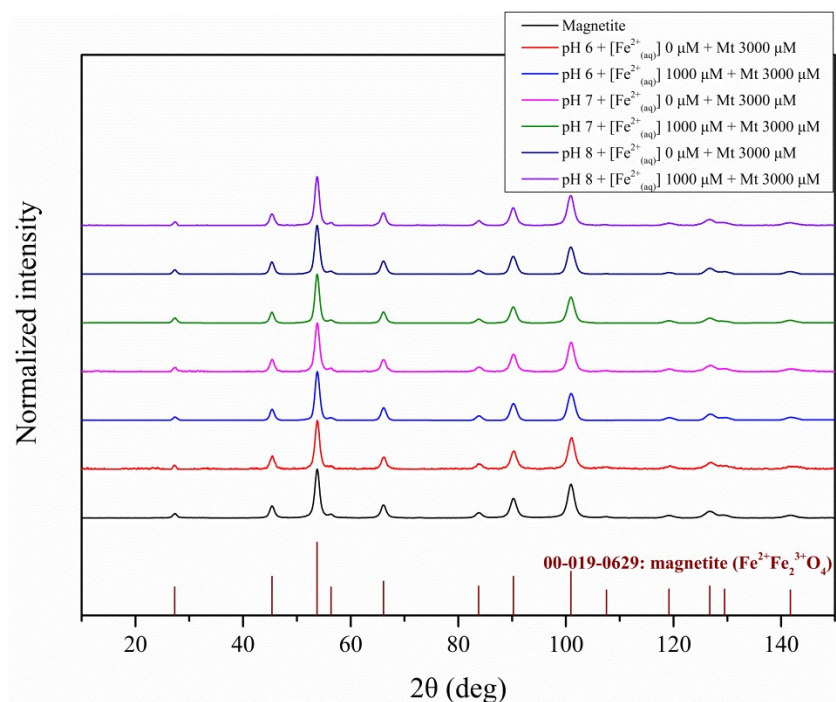

86

87 Figure S5: XRD patterns of magnetite NPs in the stock suspension (black) and in the buffer solution at  
 88 pH 6 (red), pH 7 (magenta), and pH 8 (navy), respectively, as well as those of NPs after 24-hour  
 89 reaction with 1000  $\mu\text{M}$   $\text{Fe}^{2+}_{(\text{aq})}$  at pH 6 (blue), pH 7 (green), and pH 8 (purple), respectively. The  
 90 reference for magnetite (JCPDS card number: 00-019-0629) is shown in brown at the bottom.

91

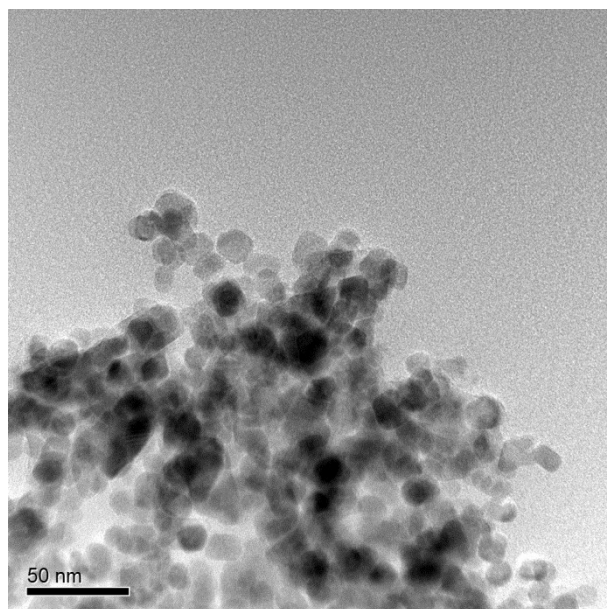

92

93 Figure S6. The representative TEM image of magnetite NPs after reaction with  $\text{Fe}^{2+}_{(\text{aq})}$  at pH 7

94

95 **REFERENCES**

96

97 1. J. Liu, C. I. Pearce, O. Qafoku, E. Arenholz, S. M. Heald and K. M. Rosso, Tc(VII) reduction  
98 kinetics by titanomagnetite ( $\text{Fe}_{3-x}\text{Ti}_x\text{O}_4$ ) nanoparticles, *Geochim. Cosmochim. Acta*, 2012, **92**,  
99 67-81.

100 2. C. I. Pearce, O. Qafoku, J. Liu, E. Arenholz, S. M. Heald, R. K. Kukkadapu, C. A. Gorski, C.  
101 M. B. Henderson and K. M. Rosso, Synthesis and properties of titanomagnetite ( $\text{Fe}_{3-x}\text{Ti}_x\text{O}_4$ )  
102 nanoparticles: A tunable solid-state Fe(II/III) redox system, *J. Colloid Interface Sci.*, 2012, **387**,  
103 24-38.

104 3. L. L. Stookey, Ferrozine---a new spectrophotometric reagent for iron, *Anal. Chem.*, 1970, **42**,  
105 779-781.

106
